# Supplementary material
Source: ML conference proceedings conference paper supplement (https://openreview.net/forum?id=ScIl8wLj9lc)

SPNE  
A: (1, 0); (1, 0)  
B: (1, 0); (1, 0)

|   |   |      |      |
|---|---|------|------|
|   |   | B    |      |
|   |   | L    | R    |
| A | U | 1, 1 | 3, 0 |
|   | D | 0, 8 | 0, 0 |

one NE  
strategy (A, B)  
(1, 0), (1, 0)  
expected payoff vector (A, B)  
(1, 1) ..... SWNE

zero immediate rewards

|   |   |      |      |
|---|---|------|------|
|   |   | B    |      |
|   |   | L    | R    |
| A | U | 0, 8 | 0, 0 |
|   | D | 0, 0 | 5, 2 |

three NEs

strategy (A, B)  
(1, 0), (1, 0)  
(1/5, 4/5), (1, 0)  
(0, 1), (0, 1)  
expected payoff vector (A, B)  
(0, 8) ..... SWNE  
(0, 8/5)  
(5, 2)

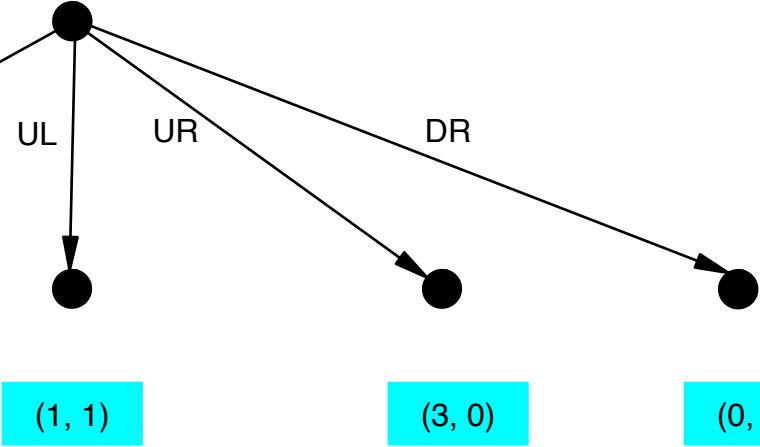

SPNE  
A: (0, 1); (0, 1)  
B: (1, 0); (0, 1)

|   |   |      |      |
|---|---|------|------|
|   |   | B    |      |
|   |   | L    | R    |
| A | U | 1, 1 | 3, 0 |
|   | D | 5, 2 | 0, 0 |

one NE  
strategy (A, B)  
(0, 1), (1, 0)  
expected payoff vector (A, B)  
(5, 2) ..... SWNE

zero immediate rewards

|   |   |      |      |
|---|---|------|------|
|   |   | B    |      |
|   |   | L    | R    |
| A | U | 0, 8 | 0, 0 |
|   | D | 0, 0 | 5, 2 |

three NEs

strategy (A, B)  
(1, 0), (1, 0)  
(1/5, 4/5), (1, 0)  
(0, 1), (0, 1)  
expected payoff vector (A, B)  
(0, 8) ..... SWNE  
(0, 8/5)  
(5, 2)

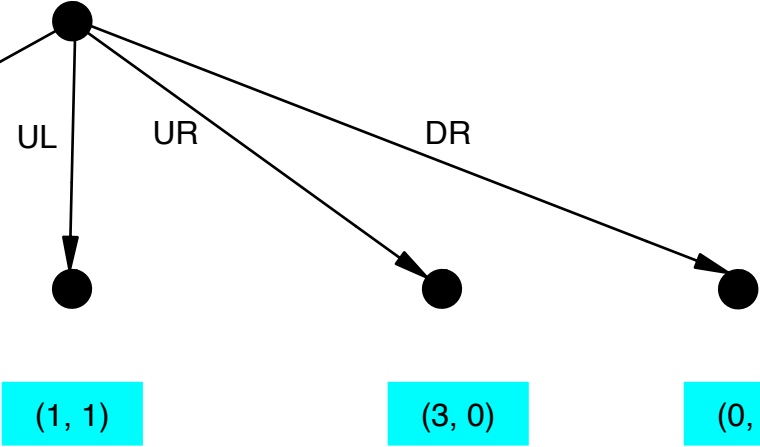

SPNE  
A: (1, 0); (1/5, 4/5)  
B: (1, 0); (1, 0)

|   |   |        |      |
|---|---|--------|------|
|   |   | B      |      |
|   |   | L      | R    |
| A | U | 1, 1   | 3, 0 |
|   | D | 0, 8/5 | 0, 0 |

one NE  
strategy (A, B)  
(1, 0), (1, 0)  
expected payoff vector (A, B)  
(1, 1) ..... SWNE

zero immediate rewards

|   |   |      |      |
|---|---|------|------|
|   |   | B    |      |
|   |   | L    | R    |
| A | U | 0, 8 | 0, 0 |
|   | D | 0, 0 | 5, 2 |

three NEs

strategy (A, B)  
(1, 0), (1, 0)  
(1/5, 4/5), (1, 0)  
(0, 1), (0, 1)  
expected payoff vector (A, B)  
(0, 8) ..... SWNE  
(0, 8/5)  
(5, 2)

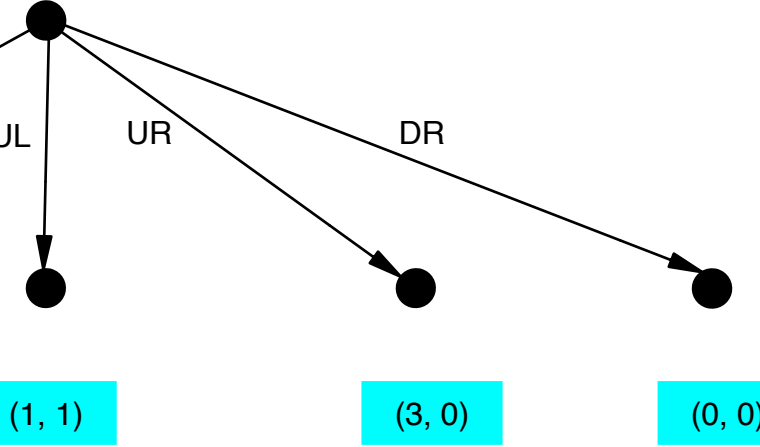

Supplement: supplementary_material [file attachment]
